# Supplementary material for: A Possible Natural and Inexpensive Substitute for Lapis Lazuli in the Frederick II Era: The Finding of Haüyne in Blue Lead-Tin Glazed Pottery from Melfi Castle (Italy)
Source: MDPI journal article supplement (doi:10.3390/molecules28041546), 2023-02-06
Supplement: s1 [file s1]

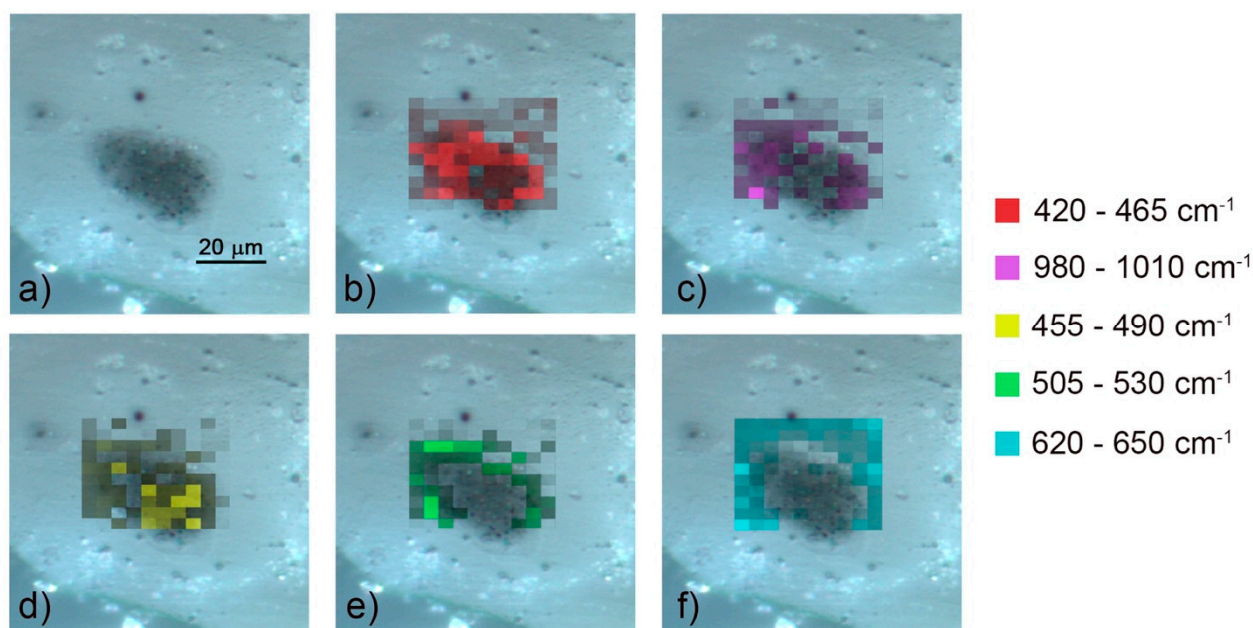

**Figure S1:** Optical image of hauyne 3 (a) and results of the respective Raman mapping according to 420-465  $\text{cm}^{-1}$  (b), 980-1010  $\text{cm}^{-1}$  (c), 455-490  $\text{cm}^{-1}$  (d), 505-530  $\text{cm}^{-1}$  (e) and 620-650  $\text{cm}^{-1}$  (f) spectral regions.

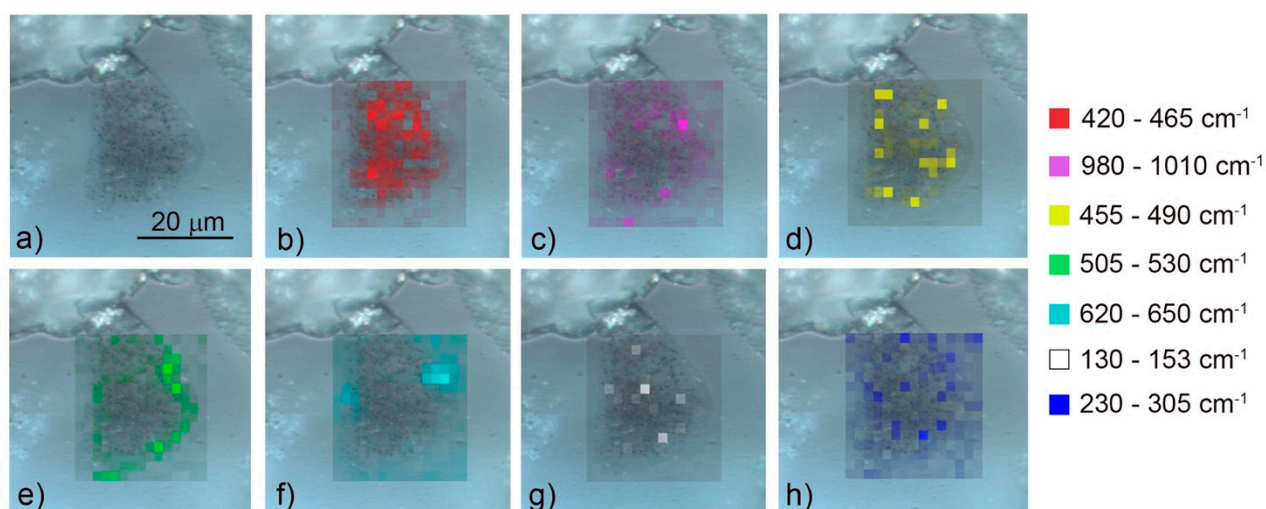

**Figure S2:** Optical image of hauyne 5 (a) and results of the respective Raman mapping according to 420-465  $\text{cm}^{-1}$  (b), 980-1010  $\text{cm}^{-1}$  (c), 455-490  $\text{cm}^{-1}$  (d), 505-530  $\text{cm}^{-1}$  (e), 620-650  $\text{cm}^{-1}$  (f), 130-153  $\text{cm}^{-1}$  (g) and 230-305  $\text{cm}^{-1}$  (h) spectral regions.
